# Supplementary material for: Stable color-tunable Ca3Y(GaO)3(BO3)4:Bi3+/Tb3+/Eu3+ phosphors for application in n-UV-pumped wLEDs
Source: Royal Society of Chemistry journal article supplement (doi:10.1039/d3dt04264b), 2024-01-01
Supplement: d3dt04264b1.pdf [file d3dt04264b1.pdf]

## Supporting information

### **Stable Color-Tunable $\text{Ca}_3\text{Y}(\text{GaO})_3(\text{BO}_3)_4$ : $\text{Bi}^{3+}/\text{Tb}^{3+}/\text{Eu}^{3+}$ Phosphors for Application in $n$ -UV Pumped $w$ LEDs**

*P. J. Xia<sup>1</sup>, X. Z. Zheng<sup>1</sup>, L. Yue<sup>1</sup>, Y. F. Lei<sup>2</sup>, M. Xu<sup>1</sup>, W. B. Dai<sup>\*1,3</sup>*

*<sup>1</sup>Hubei Key Laboratory of Plasma Chemistry and Advanced Materials & Key Laboratory of Green Chemical Engineering Process of Ministry of Education, Wuhan Institute of Technology, 430205, Wuhan, P. R. China*

*<sup>2</sup>Hubei Key Laboratory of Electronic Manufacturing and Packaging Integration (Wuhan University), Wuhan University, Wuhan, 430072, P. R. China*

*<sup>3</sup>Key Laboratory of Testing and Tracing of Rare Earth Products for State Market Regulation, Jiangxi University of Science and Technology, 341000, Ganzhou, P. R. China*

*\*Corresponding author: [wubin.dai@wit.edu.cn](mailto:wubin.dai@wit.edu.cn) (W. Dai)*

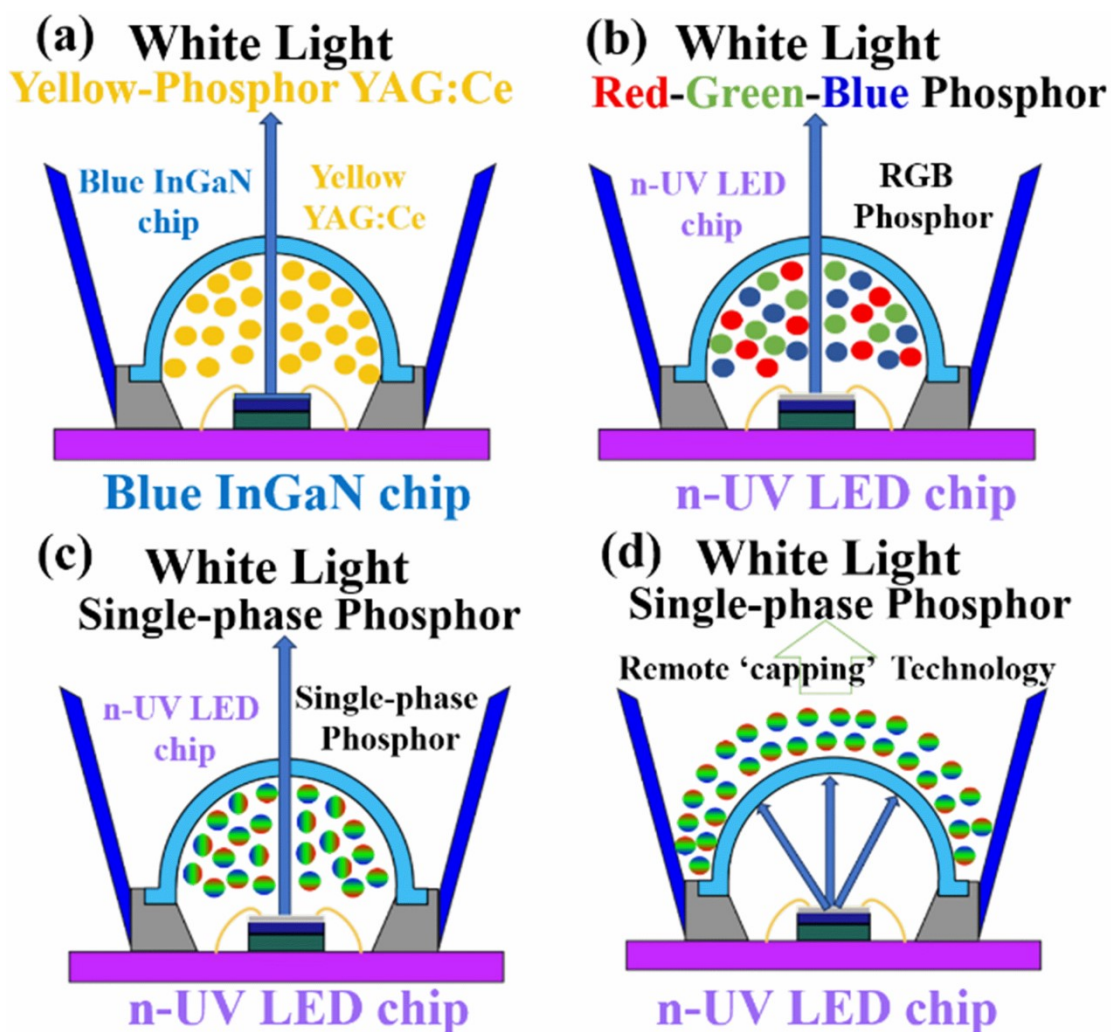

Scheme S1 The different forms of the assembly modes for the pc-wLEDs, a) traditional packaging via 'the blue LED chip + yellow phosphor YAG: Ce', b) traditional packaging via 'n-UV LED chip + red, green and blue phosphors', c) traditional packaging via 'n-UV LED chip + single-phase white-emitting phosphor', and d) remote 'capping' packaging via 'n-UV LED chip + single-phase white-emitting phosphor', respectively.

Table S1 Instrumental data used for Rietveld refinements for the CYGB host and its Bi/Tb/Eu (co)doped derivatives

| Items                     | Parameters |
|---------------------------|------------|
| Primary and second radius | 217.5 nm   |
| Receiving slit length     | 13.65°     |
| Source and sample length  | 12 mm      |
| Primary slit aperture     | 2.5°       |

|                                 |            |
|---------------------------------|------------|
| Reception slit divergence angle | 0.2°       |
| Receiving slit width            | 0.1 mm     |
| Peak-shape function             | Lorentzian |

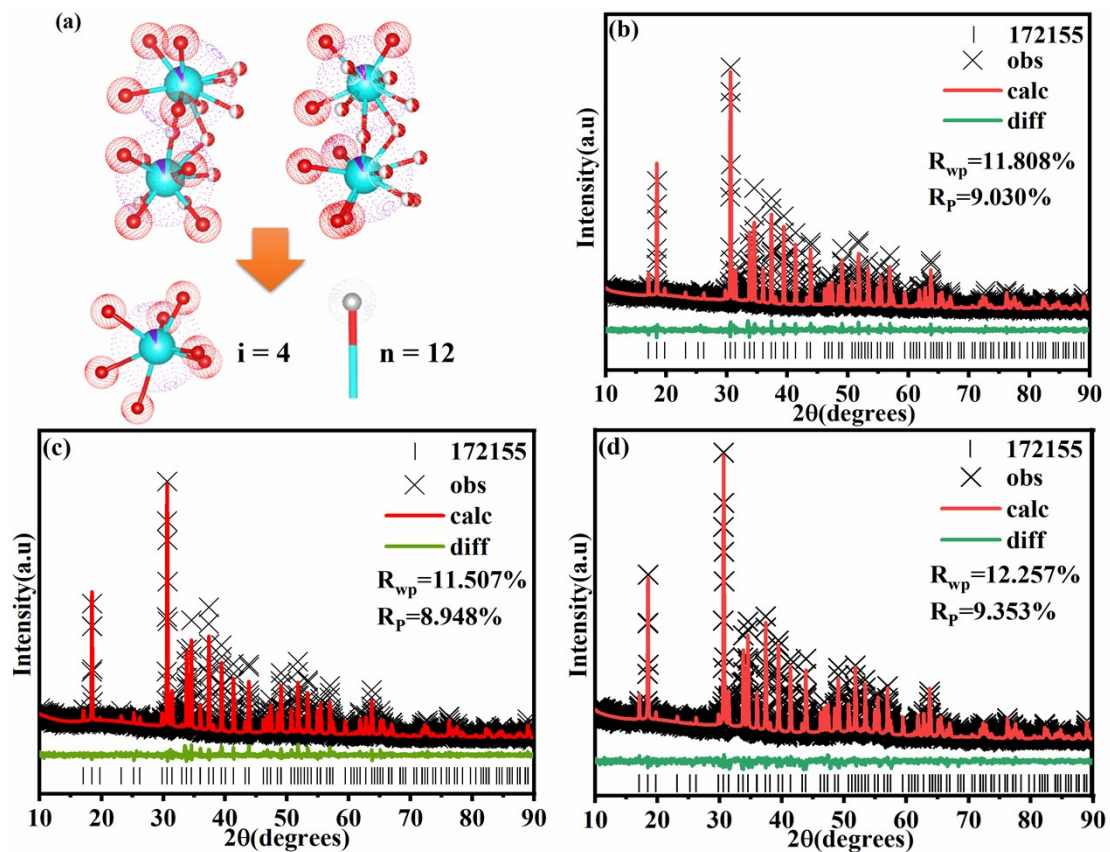

Fig.S1 a) The sketch map for explaining the  $CN = 7$  of the  $Ca_2/Y_2$  site in CYGB matrix. The Rietveld refinement results of the sample b) CYGB: 2%Bi, c) CYGB: 2%Bi, 18Tb, and d) CYGB: 10%Tb, 16%Eu, respectively.

Table S2 Selected bond lengths and calculated average bond lengths of the distinct cations  $Ca_1/Y_1$  and  $Ca_2/Y_2$  with surrounding oxygens in CYGB

| Vector         | Bond length   | Average length | Vector         | Bond length  | Average length |
|----------------|---------------|----------------|----------------|--------------|----------------|
| $Ca_1/Y_1-O_3$ | 2.47548Å (14) |                | $Ca_2/Y_2-O_4$ | 2.33274Å (9) |                |
| $Ca_1/Y_1-O_3$ | 2.47548Å (14) |                | $Ca_2/Y_2-O_4$ | 2.3959Å (3)  |                |
| $Ca_1/Y_1-O_3$ | 2.47548Å (14) |                | $Ca_2/Y_2-O_4$ | 2.3959Å (3)  |                |

|                                     |               |          |                                     |               |         |
|-------------------------------------|---------------|----------|-------------------------------------|---------------|---------|
| $\text{Ca}_1/\text{Y}_1\text{-O}_3$ | 2.47548Å (14) |          | $\text{Ca}_2/\text{Y}_2\text{-O}_4$ | 2.3959Å (3)   |         |
| $\text{Ca}_1/\text{Y}_1\text{-O}_3$ | 2.47548Å (14) | 2.41786Å | $\text{Ca}_2/\text{Y}_2\text{-O}_4$ | 2.3993Å (3)   | 2.3955Å |
| $\text{Ca}_1/\text{Y}_1\text{-O}_3$ | 2.47548Å (14) |          | $\text{Ca}_2/\text{Y}_2\text{-O}_4$ | 2.33274Å (9)  |         |
| $\text{Ca}_1/\text{Y}_1\text{-O}_1$ | 2.3014Å (3)   |          | $\text{Ca}_2/\text{Y}_2\text{-O}_3$ | 2.41636Å (14) |         |
| $\text{Ca}_1/\text{Y}_1\text{-O}_1$ | 2.3014Å (3)   |          | $\text{Ca}_2/\text{Y}_2\text{-O}_3$ | 2.41636Å (14) |         |
| $\text{Ca}_1/\text{Y}_1\text{-O}_1$ | 2.3014Å (3)   |          | $\text{Ca}_2/\text{Y}_2\text{-O}_2$ | 2.5043Å (3)   |         |
|                                     |               |          | $\text{Ca}_2/\text{Y}_2\text{-O}_1$ | 2.3584Å (3)   |         |

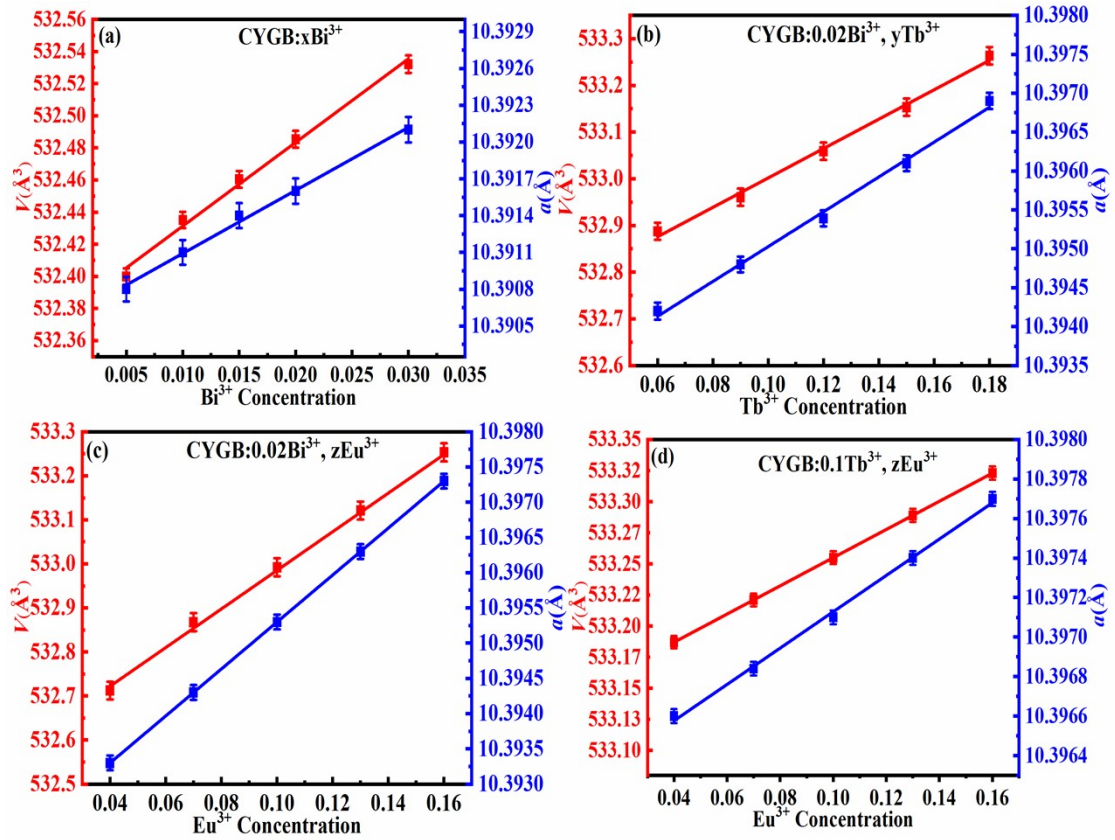

Fig.S2 Lattice parameters of the phosphors a)  $\text{CYGB}:x\text{Bi}^{3+}$ , b)  $\text{CYGB}:2\%\text{Bi}^{3+}, y\text{Tb}^{3+}$ , c)

$\text{CYGB}:2\%\text{Bi}^{3+}, z\text{Eu}^{3+}$ , and d)  $\text{CYGB}:10\%\text{Tb}^{3+}, z\text{Eu}^{3+}$  as a function of  $x$ ,  $y$ , and  $z$  as

obtained from the Rietveld refinement of XRD data. All colored solid lines are the linear fits.

Table S3 The weight and atomic percentage of each atom in  $\text{Ca}_3\text{Y}(\text{GaO})_3(\text{BO}_3)_4:2\%\text{Bi}^{3+}, 10\%\text{Tb}^{3+}, 12\%\text{Eu}^{3+}$  phosphor

| Atom | Weight(%) | Atomic(%) |
|------|-----------|-----------|
| Ca   | 16.73     | 11.54     |

|       |      |       |
|-------|------|-------|
| Y     | 9.42 | 2.92  |
| Ga    | 29.1 | 11.54 |
| B     | 6.02 | 15.39 |
| O     | 33.4 | 57.69 |
| Bi    | 0.58 | 0.08  |
| Tb    | 2.21 | 0.38  |
| Eu    | 2.54 | 0.46  |
| Total | 100  | 100   |

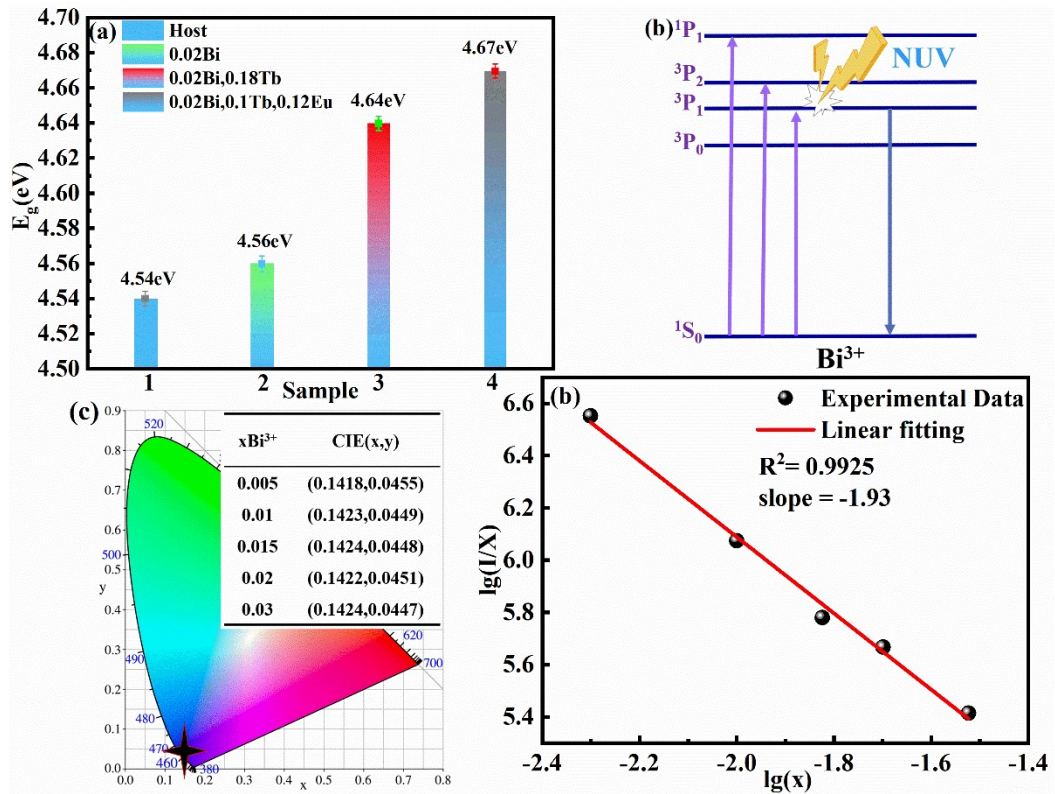

Fig.S3 a) The variation of the bandgap value with the (co)doping content. b) The energy level scheme of the  $\text{Bi}^{3+}$  ion. c) The CIE diagram for the CYGB: 2%Bi and the CIE coordinates of the phosphors CYGB:  $x\text{Bi}^{3+}$ . d) The plot of the linear fitting for the  $\lg(I/x)$  vs.  $\lg(x)$  of the CYGB: 2%Bi.

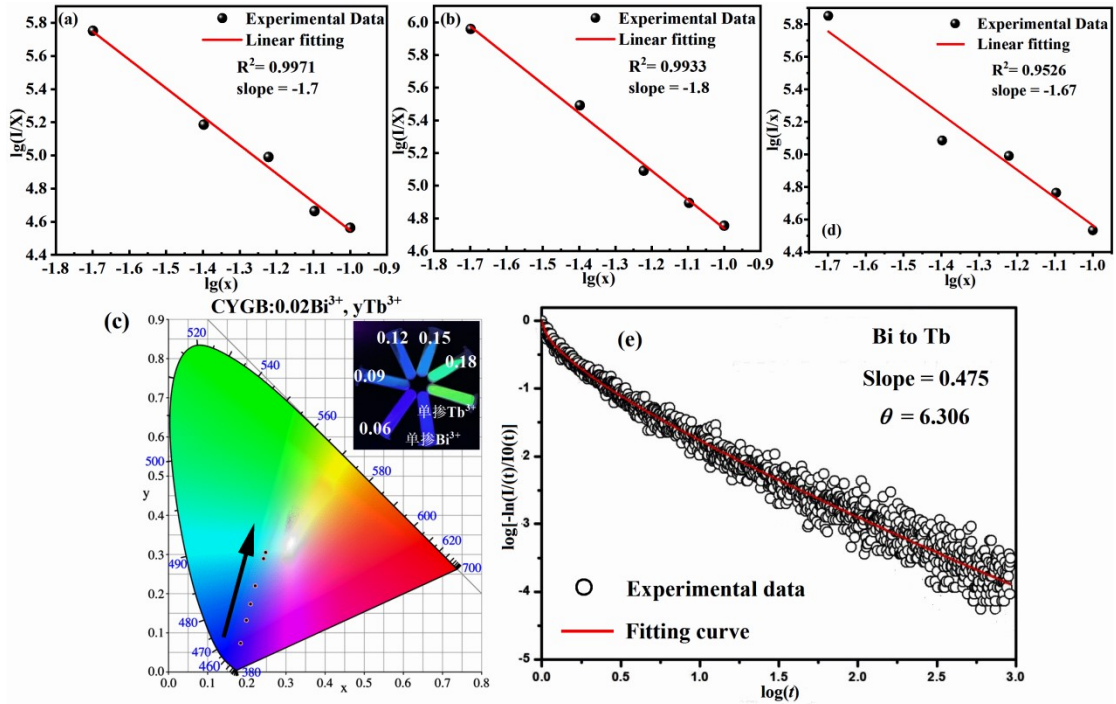

Fig S4 The functional relationship between  $\lg(I/x)$  and  $\lg(x)$  with their linear fits of the a) CYGB:  $yTb$  and b) CYGB:  $zEu$ . c) The CIE chromaticity diagram and coordinates of the phosphors CYGB: 2%Bis,  $yTb$ , the inset shows the digital images of the phosphors. d) The functional relationship between  $\lg(I/x)$  and  $\lg(x)$  with its linear fit of the CYGB: 2%Bis,  $yTb$ . e) The Inokuti-Hirayama model fitting for the data of the phosphor CYGB: 2%Bis, 18%Tb.

Table S4 The calculated  $\tau_{ave}$ , ET efficiency ( $\eta_{ET}$ ) and probability ( $P_{ET}$ ) of the representative codoped phosphors *via* fitting the decay curves

|                    | $A_1$ | $\tau_1$ (ns) | $A_2$ | $\tau_2$ ( $\mu$ s) | $\tau_{ave}$ (ns) | $\eta_{ET}$ | $P_{ET}$ |
|--------------------|-------|---------------|-------|---------------------|-------------------|-------------|----------|
| CYGB: 2%Bis, $yTb$ |       |               |       |                     |                   |             |          |
| $y = 0$            | 133   | 47            | 352   | 463.1               | 446.8             | -           | -        |
| $y = 9\%$          | 185   | 44            | 328   | 367.6               | 327.3             | 0.267       | 0.00082  |
| $y = 15\%$         | 206   | 43            | 301   | 264.1               | 204.2             | 0.543       | 0.0027   |
| $y = 18\%$         | 247   | 37            | 269   | 142.8               | 106.4             | 0.762       | 0.0072   |
| $y = 21\%$         | 342   | 24            | 186   | 84.3                | 69.5              | 0.844       | 0.0122   |
| CYGB: 2%Bis, $zEu$ |       |               |       |                     |                   |             |          |
| $z = 4\%$          | 146   | 46            | 342   | 376.5               | 346.2             | 0.225       | 0.00065  |

|            |     |    |     |       |       |       |        |
|------------|-----|----|-----|-------|-------|-------|--------|
| $z = 10\%$ | 197 | 43 | 316 | 296.2 | 263.8 | 0.409 | 0.0016 |
| $z = 13\%$ | 268 | 39 | 284 | 165.9 | 136.7 | 0.694 | 0.0051 |
| $z = 19\%$ | 351 | 28 | 208 | 126.7 | 86.4  | 0.807 | 0.0093 |

CYGB: 10%Tb, zEu

|            |     |                     |    |      |         |       |      |
|------------|-----|---------------------|----|------|---------|-------|------|
| $z = 0$    | 684 | 7.05 $\mu\text{s}$  | 41 | 1977 | 1.93 ms | -     | -    |
| $z = 4\%$  | 592 | 12.06 $\mu\text{s}$ | 36 | 1248 | 0.53 ms | 0.725 | 1.37 |
| $z = 10\%$ | 537 | 10.28 $\mu\text{s}$ | 23 | 895  | 0.36 ms | 0.813 | 2.26 |
| $z = 13\%$ | 498 | 8.42 $\mu\text{s}$  | 21 | 796  | 0.26 ms | 0.865 | 3.33 |
| $z = 19\%$ | 461 | 6.98 $\mu\text{s}$  | 18 | 724  | 0.24 ms | 0.876 | 3.65 |

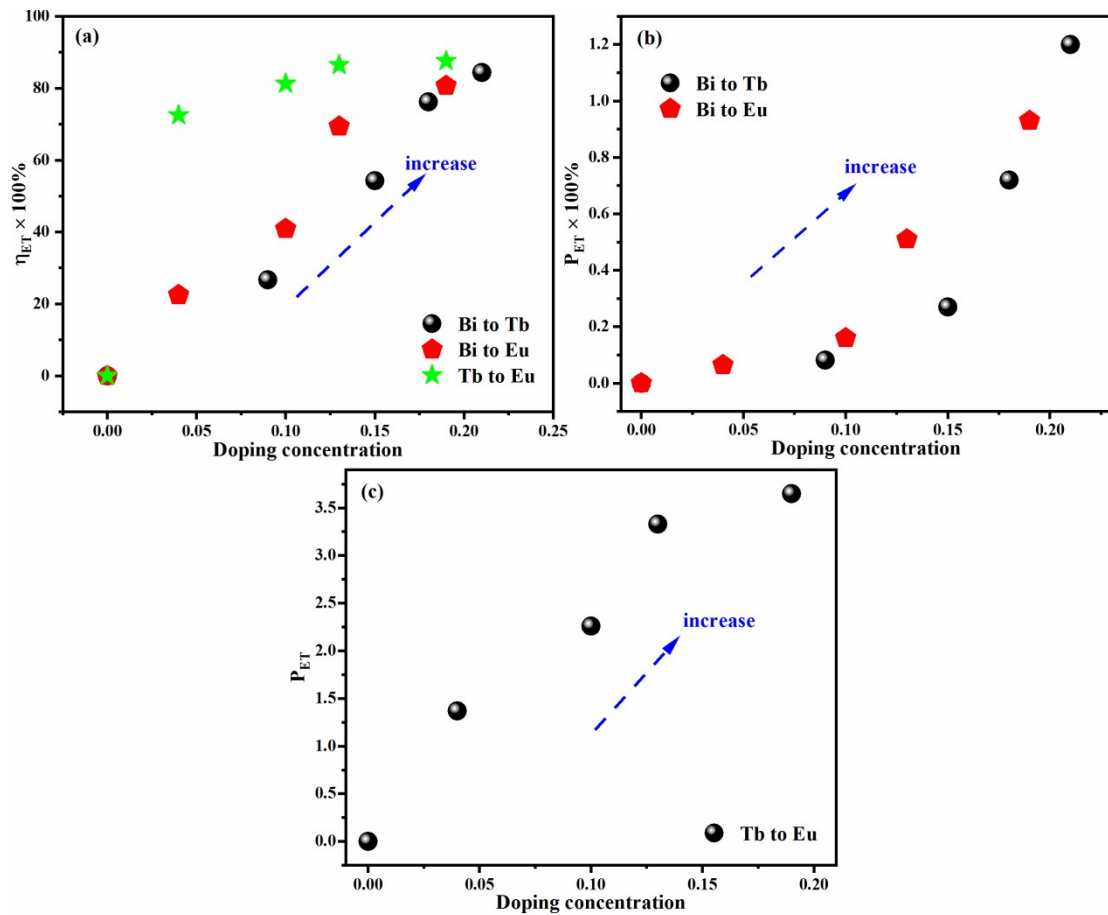

Fig.S5 a) The calculated ET efficiency of the codoped phosphors CYGB: 2%B<sub>i</sub>, yTb, CYGB: 2%B<sub>i</sub>, zEu and CYGB: 10%Tb, zEu. b) The corresponding ET probability of the codoped phosphors CYGB: 2%B<sub>i</sub>, yTb and CYGB: 2%B<sub>i</sub>, zEu. c) The corresponding ET probability of the codoped phosphors CYGB: 10%Tb, zEu.

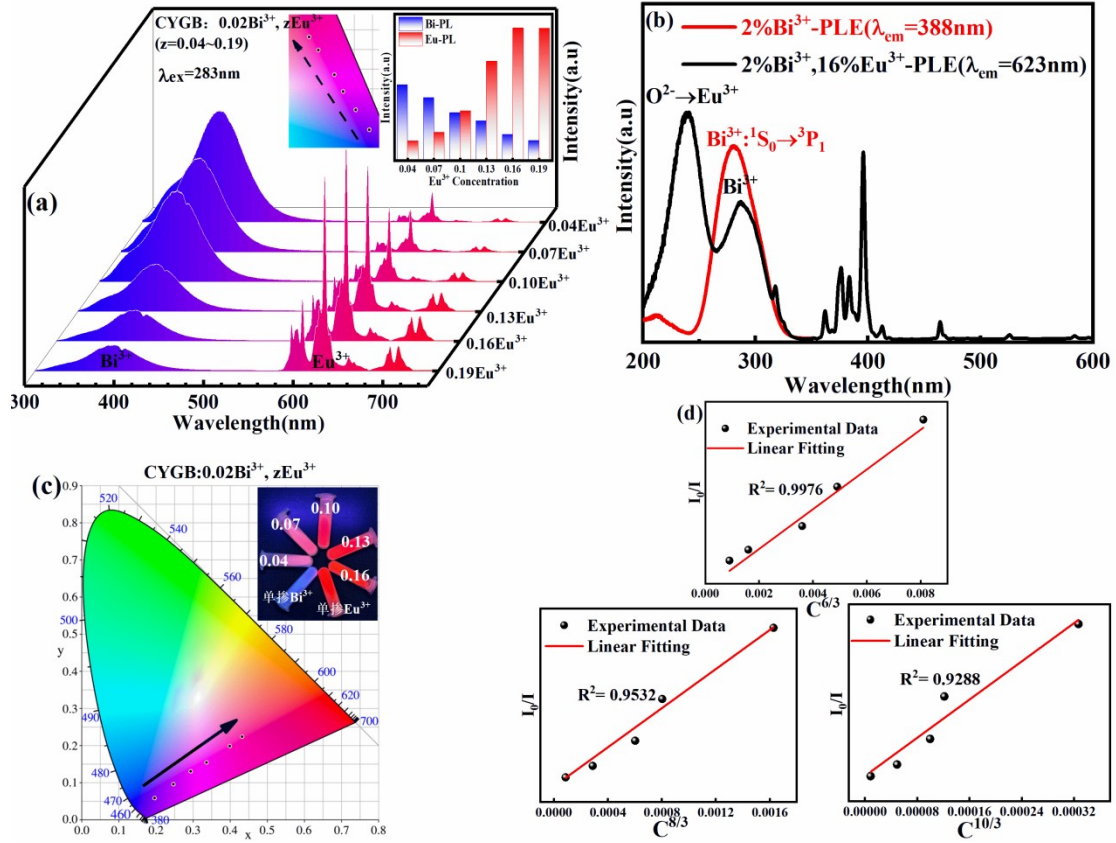

Fig.S6 a) The variation of the PL intensities of the Bi and Eu in the phosphors CYGB: 2%B<sup>3+</sup>, zEu under  $\lambda_{ex} = 283$  nm, the insets show the change of the CIE coordinates and the intensity change, respectively. b) The comparison of the PLE spectra of the CYGB: 2%B<sup>3+</sup> and CYGB: 2%B<sup>3+</sup>, 16Eu under  $\lambda_{em} = 388$  nm and  $\lambda_{em} = 623$  nm, respectively. c) The variation of the CIE coordinates of the phosphors, the inset shows the corresponding digital image. d) Dependence of  $I_{S0}/I_S$  of Bi/Eu on the  $C^{6/3}$ ,  $C^{8/3}$  and  $C^{10/3}$  in CYGB: CYGB: 2%B<sup>3+</sup>, zEu.



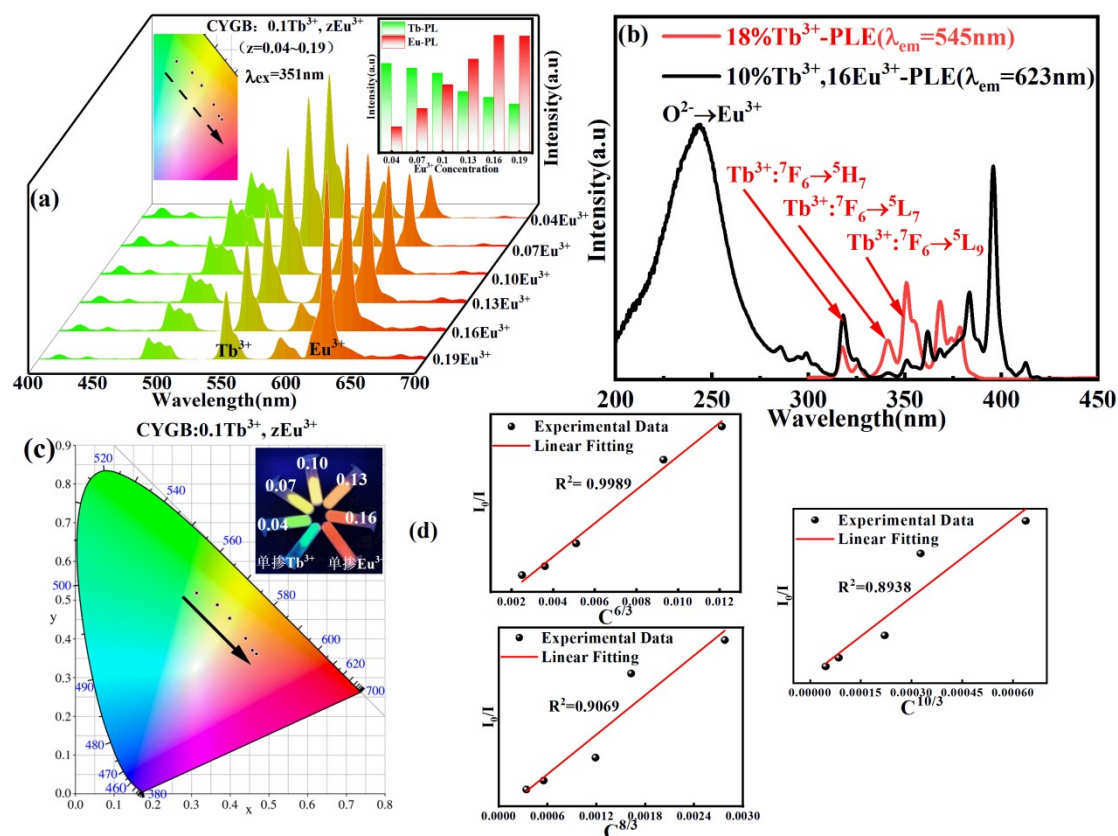

Fig.S7 a) The variation of the PL intensities of the Tb and Eu in the phosphors CYGB: 10%Tb, zEu under  $\lambda_{ex} = 351\text{ nm}$ , the insets show the change of the CIE coordinates and the intensity change, respectively. b) The comparison of the PLE spectra of the CYGB: 10%Tb and CYGB: 10%Tb, 16Eu under  $\lambda_{em} = 545\text{ nm}$  and  $\lambda_{em} = 623\text{ nm}$ , respectively. c) The variation of the CIE coordinates of the phosphors, the inset shows the corresponding digital image. d) Dependence of  $I_{S0}/I_S$  of Tb/Eu on the  $C^{6/3}$ ,  $C^{8/3}$  and  $C^{10/3}$  in CYGB: 10%Tb, zEu.

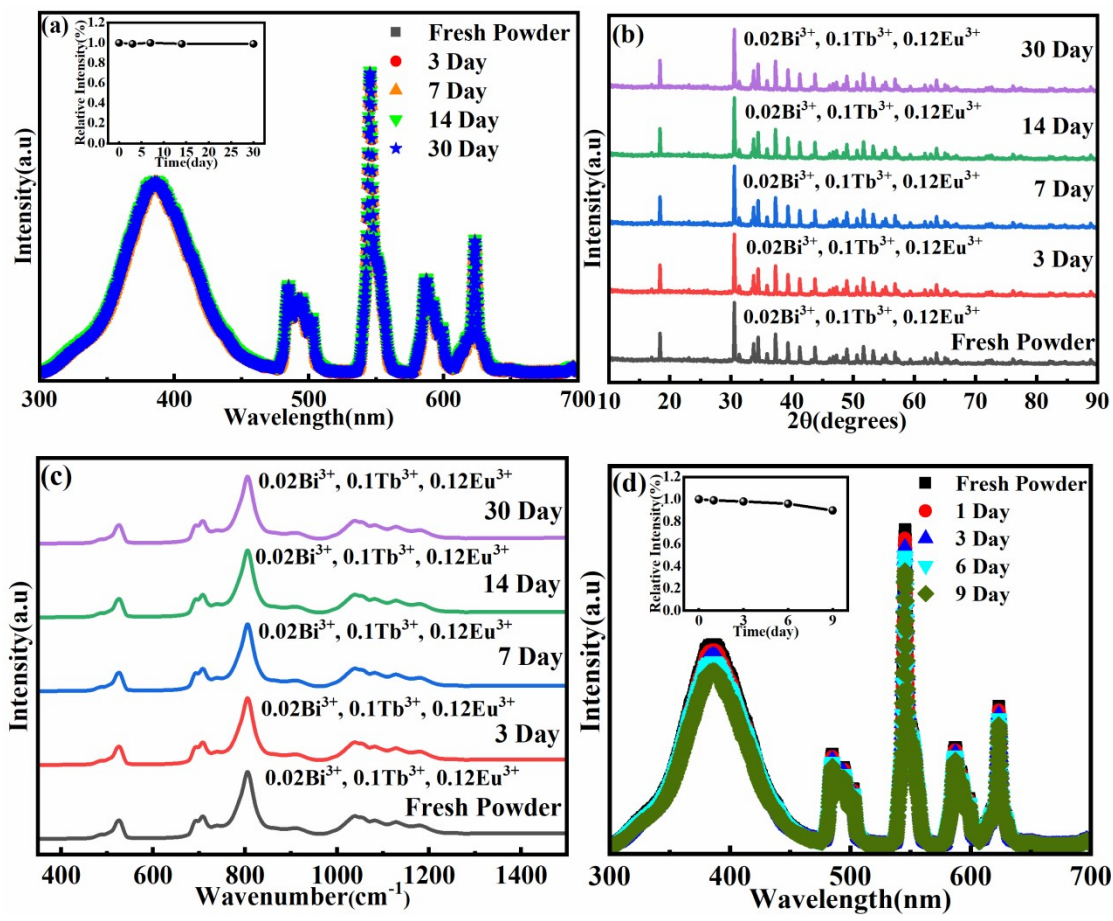

Fig.S8 a) The unchanged PL spectra of CYGB: 2%B<sub>i</sub>, 10%T<sub>b</sub>, 12%E<sub>u</sub> under ambient atmosphere and at RT for different time interval. b-c) The XRD and FTIR spectra of the phosphor before and after one month under exposure to the ambient environment and at RT. d) The slight decrease of the PL intensity of the phosphor CYGB: 2%B<sub>i</sub>, 10%T<sub>b</sub>, 12%E<sub>u</sub> under the harsh conditions (high relative humidity ~ 80% under 323 K) for different time interval, the inset shows the relative PL intensities at measured time.

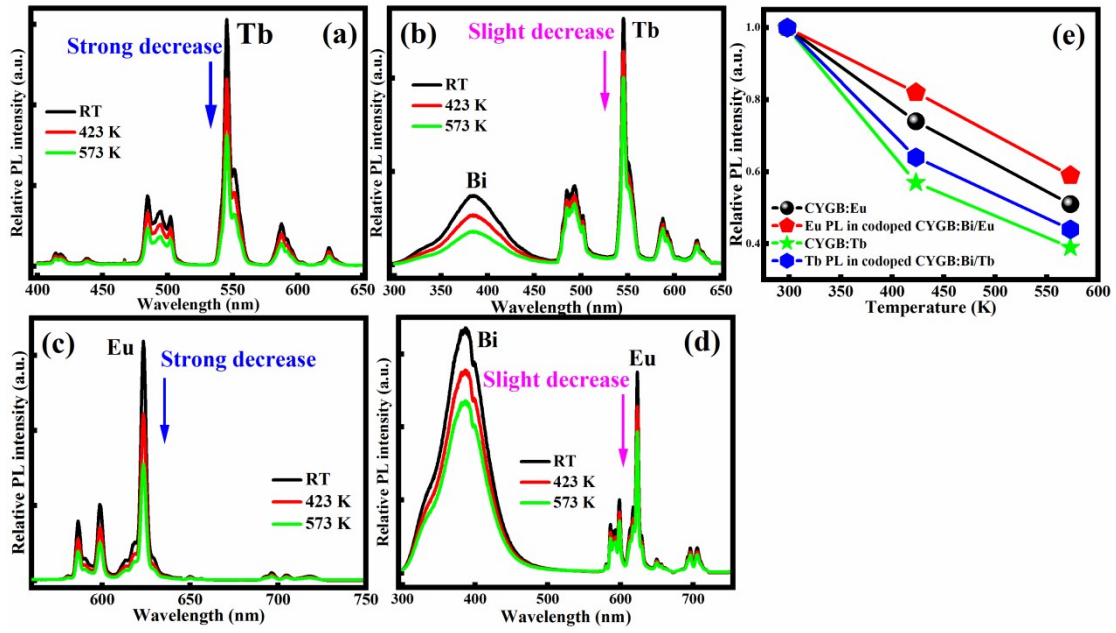

Fig.S9 a, c) The decline of the PL intensities from the Tb and Eu singly doped phosphors CYGB: 10%Tb and CYGB: 12%Eu, respectively under different temperature. b, d) The decrease of the PL intensities of the Tb and Eu in the codoped phosphors CYGB: 2%Bi/10%Tb and CYGB: 2%Bi/12%Eu, respectively under different temperature. e) The comparison of the PL intensities of the Tb and Eu in the singly and codoped phosphors at measured temperature.
